# Supplementary material for: Persistence and variation in microstructural design during the evolution of spider silk
Source: PubMed Central journal article supplement (PMC4594040; doi:10.1038/srep14820), 2015-10-06
Supplement: srep14820-s1.pdf [file srep14820-s1.pdf]

# **Persistence and variation in microstructural design during the evolution of spider silk**

R. Madurga<sup>1,2</sup>, T.A. Blackledge<sup>3</sup>, B. Perea<sup>1,2</sup>, G.R. Plaza<sup>1,2</sup>, C. Riekel<sup>4</sup>, M. Burghammer<sup>4</sup>, M. Elices<sup>1,2</sup>, G. Guinea<sup>1,2</sup>, J. Pérez-Rigueiro<sup>1,2\*</sup>

<sup>1</sup> Centro de Tecnología Biomédica. Universidad Politécnica de Madrid. 28223 Pozuelo de Alarcón (Madrid). Spain

<sup>2</sup> Departamento de Ciencia de Materiales. ETSI Caminos, Canales y Puertos. Universidad Politécnica de Madrid, 28040 Madrid. Spain

<sup>3</sup> Department of Biology and Integrated Bioscience Program. The University of Akron, Akron, OH44325-3908.USA

<sup>4</sup> European Synchrotron Radiation Facility, B.P. 220, F-38043, Grenoble Cedex. France

## **SUPPLEMENTARY INFORMATION**

### **FIGURE METHODS**

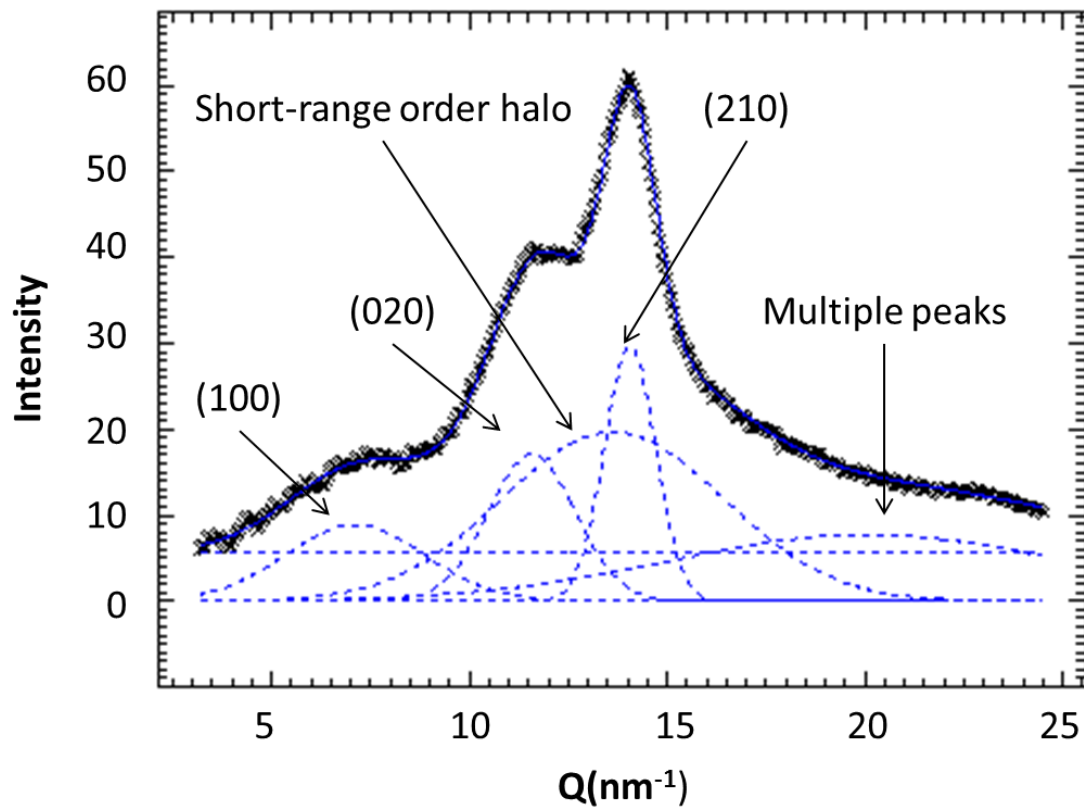

**Figure Methods 1:** Representative azimuthal integration of an XRD diffraction pattern, and deconvolution into different contributions. The experimental profile is fitted using Gaussian functions for the Bragg reflections and short-range-order scattering, and a constant for the residual background scattering of the sample. Experimental data correspond to a maximum supercontracted fiber spun by a *Caerostris darwini* spider.

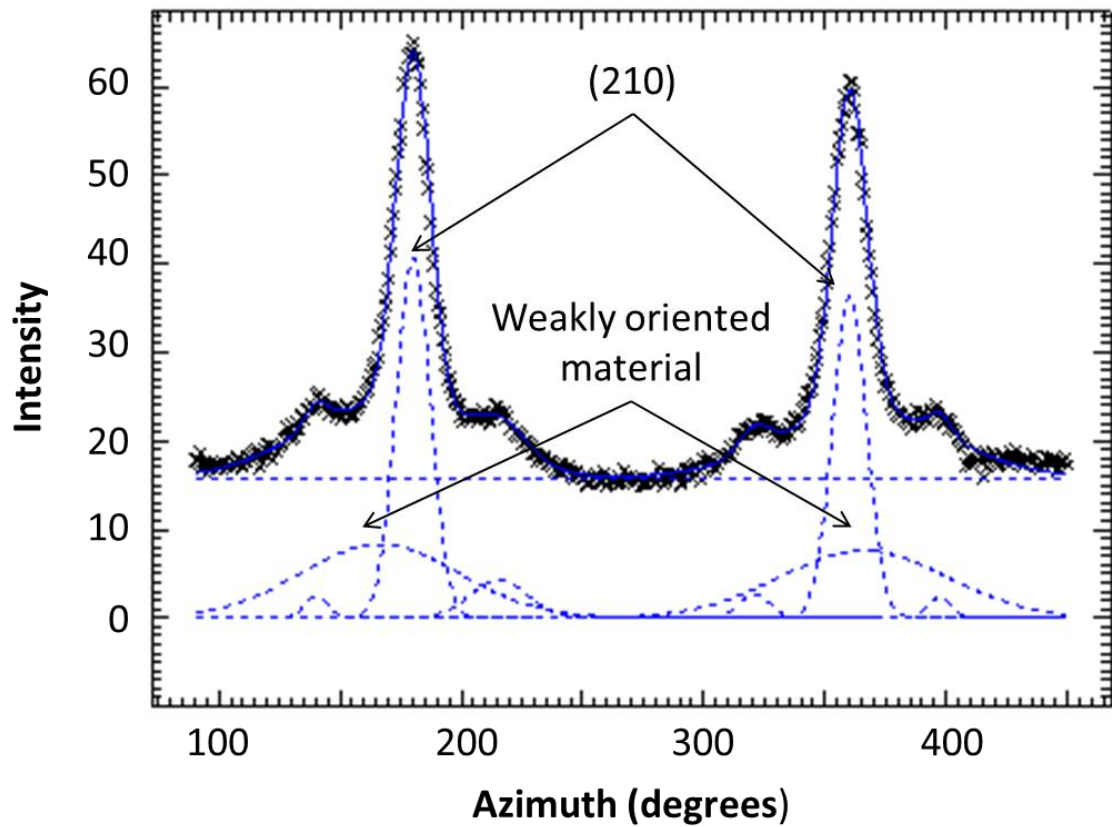

**Figure Methods 2:** Representative azimuthal fit of the radially integrated (210) reflection from an XRD pattern of a maximum supercontracted MAS fiber spun by a *Caerostris darwini* spider assuming Gaussian functions for the Bragg reflections and a constant background.

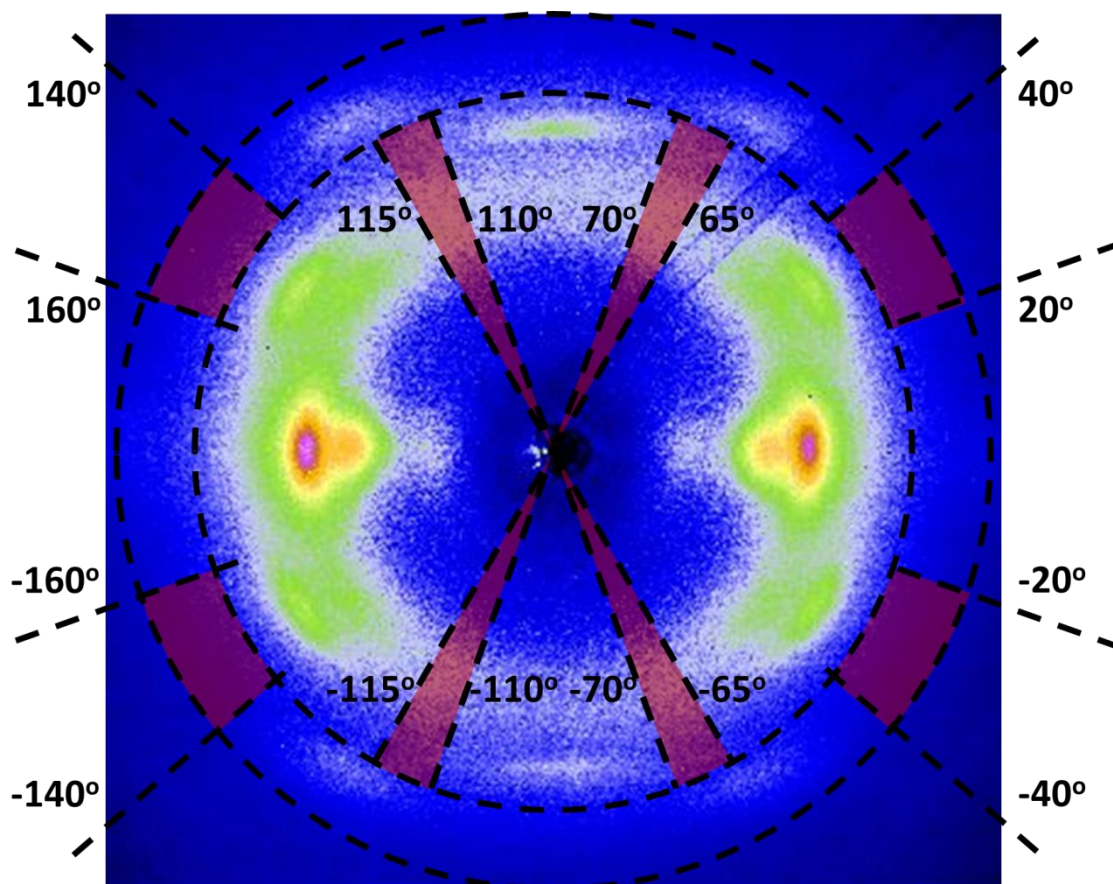

**Figure Methods 3:** Scheme of the areas selected to calculate the average intensity produced by the amorphous fraction of the fiber by azimuthal integration. XRD pattern corresponds to a *Caerostris darwini* MAS fiber. Angles were adjusted, if necessary, for other patterns in order to select areas where the intensities of the Bragg peaks can be considered negligible.
